# Supplementary material
Source: Springer Nature journal article supplement (https://www.springermedizin.de/resource/supplementary/13722_2013_234_MOESM1_ESM.pdf/9675326)

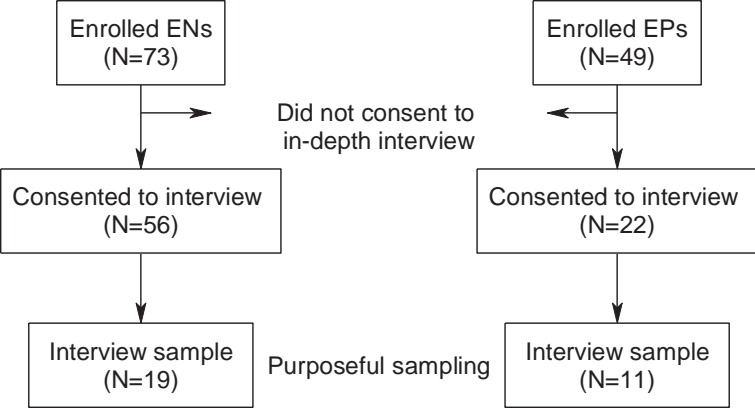

Supplement: MOESM1 [file 9675326]
